1

# 2 **The Glycan-Specificity of the Pineapple Lectin AcMJRL and its** 3 **Carbohydrate-Dependent Binding of the SARS-CoV-2 Spike** 4 **Protein**

5

6 Joscha Meiers<sup>#1-3</sup>, Jan Dastbaz<sup>#2,4,5</sup>, Sebastian Adam<sup>2,6</sup> Sari Rasheed<sup>2,4,5</sup>, Susanne H.  
7 Kirsch<sup>2,5</sup>, Peter Meiser<sup>7</sup>, Peter Gross<sup>\*8</sup>, Rolf Müller<sup>\*2,4,5</sup>, Alexander Titz<sup>\*1-3</sup>

8

9 <sup>1</sup> Chemical Biology of Carbohydrates (CBCH), Helmholtz Institute for Pharmaceutical  
10 Research Saarland (HIPS), Helmholtz Centre for Infection Research, D-66123 Saarbrücken,  
11 Germany

12 <sup>2</sup> Deutsches Zentrum für Infektionsforschung (DZIF), Standort Hannover-Braunschweig, D-  
13 38124 Braunschweig, Germany

14 <sup>3</sup> Department of Chemistry, Saarland University, D-66123 Saarbrücken, Germany

15 <sup>4</sup> Department of Pharmacy, Saarland University, D-66123 Saarbrücken, Germany

16 <sup>5</sup> Microbial Natural Products (MINS), Helmholtz Institute for Pharmaceutical Research  
17 Saarland (HIPS), Helmholtz Centre for Infection Research, D-66123 Saarbrücken, Germany

18 <sup>6</sup> Drug Design and Optimisation (DDOP), Helmholtz Institute for Pharmaceutical Research  
19 Saarland (HIPS), Helmholtz Centre for Infection Research, D-66123 Saarbrücken, Germany

20 <sup>7</sup> URSAPHARM Arzneimittel GmbH, D-66129 Saarbrücken, Germany

21 <sup>8</sup> Hochschule Kaiserslautern, Protein Chemistry Group, D-66953 Pirmasens, Germany

22

23 <sup>#</sup>both authors contributed equally

24 <sup>\*</sup>corresponding authors: peter.gross-ALP@hs-kl.de; rolf.mueller@helmholtz-hips.de;  
25 alexander.titz@helmholtz-hips.de

## 26 **Abstract**

27

28 The current SARS-CoV-2 pandemic has become one of the most challenging global health  
29 threats, with over 530 million reported infections by May 2022. In addition to vaccines,  
30 research and development have also been directed towards novel drugs. Since the highly  
31 glycosylated spike protein of SARS-CoV-2 is essential for infection, it constitutes a prime  
32 target for antiviral agents. The pineapple-derived jacalin-related lectin (AcmJRL) is present  
33 in the medication bromelain in significant quantities and has previously been described to  
34 bind mannosides. Here, we elucidated its ligand specificity by glycan array analysis,  
35 quantified the interaction with carbohydrates and validated high-mannose glycans as  
36 preferred ligands. Because the SARS-CoV-2 spike protein was previously reported to carry  
37 a high proportion of high-mannose N-glycans, we tested the binding of AcmJRL to  
38 recombinantly produced spike protein. We could demonstrate that AcmJRL binds the spike  
39 protein with a low micromolar  $K_D$  in a carbohydrate-dependent fashion, suggesting its use  
40 as a potential SARS-CoV-2 neutralising agent.

41

## 42 **Introduction**

43

44 Since the end of 2019, the world is facing the severe acute respiratory syndrome corona-  
45 virus 2 (SARS-CoV-2) pandemic. SARS-CoV-2 is a novel coronavirus that rapidly spread  
46 all over the world and infected over 530 million people so far (May 2022). It can infect the  
47 respiratory tract and potentially results in the coronavirus-associated disease COVID-19.  
48 Especially for older or immunocompromised patients, COVID-19 is likely to be lethal. So  
49 far, more than 6.3 million deaths were reported in association with SARS-CoV-2.

50 A variety of novel and very potent vaccines entered the market at the end of 2020.  
51 Vaccination is an indispensable approach to protect society from a SARS-CoV-2 infection.  
52 However, a rising fraction of vaccinated individuals suffers from severe syndromes after  
53 infection due to a continuous adaptation of the virus. Furthermore, a very small fraction of  
54 people can not be vaccinated due to medical preconditions (1). Currently, first antiviral  
55 drugs like Remdesivir and Ritonavir/Nirmatrelvir (Paxlovid) are getting established in SARS-  
56 CoV-2 therapy and more are under investigation since we need novel pharmaceutical  
57 therapies to cure or prevent infections with SARS-CoV-2.

58 Coronavirus spike proteins (S-proteins) are essential for the infection process, they are  
59 trimerizing fusion proteins that consist of the two subunits S1 and S2. It has been shown  
60 that S-proteins have a complex and extensive glycosylation pattern (2), and coronavirus  
61 spike proteins typically contain between 23-38 N-glycosylation sites (3) per protomer with  
62 a significant population of oligomannose-type glycans (30%) (2). The elucidation of the  
63 glycosylation pattern (3) of the SARS-CoV-2 S-protein has been essential for the  
64 development of an effective vaccine (4). A site-specific glycan analysis by mass  
65 spectrometry has revealed that the 22 glycosylation sites on the S-protein monomer are  
66 occupied with a mixture of oligomannose-type, hybrid-type and complex-type glycans. The

67 content of exclusively oligomannose-type glycosylation sites was determined to be 28%,  
68 which is above the level of typical host glycoproteins (3). However, it is less than for other  
69 viral glycoproteins like HIV-1 Env, where the amount of oligomannose-type glycans was  
70 found to be around 60% (3). *N*-glycosylation is not only vital for protein folding during  
71 protein expression, but these glycans also shield antigenic epitopes of S-protein and allow  
72 the virus to evade the host's immune system (5). Further, glycans are important ligands for  
73 the first interaction with the host via its cell surface attachment receptors (5). For viral entry  
74 in airway epithelial cells, the receptor-binding domain (RBD) of SARS-CoV-2 S-protein  
75 binds angiotensin-converting-enzyme-2 (ACE2) with high affinity (6).

76 Given the extensive glycosylation of the S-proteins of coronaviruses, it has been  
77 hypothesized that targeting surface glycans of S-proteins could lead to a decreased  
78 virulence of SARS-CoV-2. In fact, a study revolving around 33 different plant carbohydrate-  
79 binding proteins, i.e. lectins, observed antiviral activity for 15 plant lectins against SARS-  
80 CoV and feline infectious peritonitis virus (FIPV) (7). Interestingly, the most prominent  
81 antiviral properties were found for mannose-specific lectins, which might be related to  
82 oligomannose-type glycans being essential for S-protein function. Further, Hoffmann et al.  
83 showed the ability of mammalian lectins (e.g. CLEC4G, CD209) to block SARS-CoV-2  
84 infection *in vitro* (8).

85 Drug repurposing is a particularly interesting approach due to the acute nature of the  
86 current pandemic and led to the use of Remdesivir. Bromelain, a pineapple (*Ananas*  
87 *comosus*) stem extract, is an approved drug that shows anti-edematous, anti-inflammatory  
88 and fibrinolytic properties and is thus used to cure trauma-induced swelling (9), (10).  
89 Proteases, peptidic protease inhibitors and the mannose-binding lectin AcmJRL (also  
90 called AnLec) are the three main protein components of bromelain (11). It is likely that  
91 proteases are responsible for the anti-inflammatory properties of bromelain. Additionally,  
92 protease inhibitors prevent unspecific proteolysis as a safety mechanism that is slowly  
93 removed during the intake of bromelain. A putative mode of action of AcmJRL remains to  
94 be uncovered.

95 AcmJRL was recently characterised by Azarkan *et al.* (12) and its surprisingly high content  
96 in bromelain was determined by Gross *et al.* (11). AcmJRL belongs to the family of Jacalin-  
97 related lectins (JRL) (13). One of the first representatives of this family is jacalin, the lectin  
98 isolated from jackfruit (*Artocarpus integrifolia*). The JRL family can be divided in two main  
99 classes according to their ligand specificity (13). Galactose-specific JRL (gJRL) are found  
100 almost exclusively in the *Moraceae* plant family, most typically in the seed. Structurally,  
101 those JRLs are tetramers of four identical protomers, each containing one carbohydrate  
102 binding site. The complex biosynthesis of mature gJRLs includes co- and post-translational  
103 modifications from one preprotein including *N*-glycosylation. On the other hand, mannose-  
104 specific jacalin-related lectins (mJRL) are found in various plants. The structure of  
105 mannose-specific JRLs is less complex as they usually consist of two, four or eight  
106 unprocessed peptides. Due to the absence of a signal peptide, they are considered as  
107 cytoplasmic proteins.

108 Isothermal titration calorimetry experiments with AcmJRL revealed rather low binding  
109 affinity towards D-mannose ( $K_a = 178 \text{ M}^{-1}$ ), D-glucose ( $K_a = 83 \text{ M}^{-1}$ ) and GlcNAc ( $K_a = 88 \text{ M}^{-1}$ )  
110 <sup>1</sup>) (12). On the other hand, oligomannose structures like mannotriose (Man- $\alpha$ -1,6(Man- $\alpha$ -  
111 1,3)Man) and mannopentaose (Man- $\alpha$ -1,6(Man- $\alpha$ -1,3)Man- $\alpha$ -1,6(Man- $\alpha$ -1,3)Man) showed  
112 significantly higher binding affinities of  $K_a = 734 \text{ M}^{-1}$  to  $1694 \text{ M}^{-1}$ .

113 Like other mannose-specific JRLs, AcmJRL adopts a characteristic  $\beta$ -prism fold and two  
114 monomers align side-by-side forming a dimer. Although a tetrameric form of AcmJRL could  
115 also be assigned from the monomers in the asymmetric unit, this is likely a crystallization  
116 artefact (see below). In co-crystal structures with D-mannose and methyl  $\alpha$ -D-  
117 mannopyranoside, two carbohydrates are bound by one monomer in a conserved binding  
118 pose. Overall, the interactions are comparable to the binding of D-mannose by BanLec, a  
119 closely related mannose-specific JRL from banana (*Musa acuminata*). BanLec is reported  
120 as a potent viral entry inhibitor of HIV-1, HCV and influenza virus (14,15). However, the  
121 mitogenic activity of native BanLec limits its therapeutic use. Interestingly, the structure of  
122 AcmJRL shares similarities with a genetically engineered BanLec (15) with reduced  
123 mitogenic activity. Thus, Azarkan *et al.* postulated a potential use of AcmJRL as an  
124 alternative to BanLec against mannosylated viruses.

125 Here, the ligand specificity of AcmJRL was further characterised with two glycan arrays  
126 and the interaction was quantified in a competitive binding assay. In a next step, we  
127 demonstrated the ability of AcmJRL to bind to the SARS-CoV-2 spike protein as well as its  
128 isolated receptor-binding domain (RBD) with low micromolar affinity in a carbohydrate-  
129 dependent manner. Further, we showed that the binding of the spike RBD to its receptor  
130 ACE2 can be inhibited by AcmJRL. Consequently, it is possible that the mannose-binding  
131 lectin AcmJRL can neutralise the SARS-CoV-2 virus through binding to its spike protein.

132

## 133 **Results and discussion**

134

### 135 **Isolation and characterisation of AcmJRL from bromelain**

136 The mannophilic lectin AcmJRL was isolated by affinity chromatography from pineapple  
137 stem extract (bromelain) on a mannosylated stationary phase according to the procedure  
138 reported by Azarkan *et al.* (12). Prior to purification, the soluble protein fraction of bromelain  
139 was obtained by aqueous extraction in presence of S-methyl methanethiosulfonate to  
140 block bromelain's high proteolytic activity. Using mannosylated sepharose beads (16) 0.9  
141 - 1.6 mg AcmJRL were obtained per gram bromelain after elution with mannose.

142 The identity of the isolated protein was confirmed by SDS-PAGE (Figure 1A) and mass  
143 spectrometry (average molecular mass = 15346 Da, Figure 1B). The main peak ( $m/z =$   
144 15388) can be assigned to an acetonitrile adduct  $[M+H+MeCN]^+$  of the AcmJRL monomer.  
145 As reported by Gross *et al.* (11), two additional mass peaks were observed in a ratio of 100  
146 : 65 : 17, separated by a mass shift of 162 Da. During the industrial production of bromelain,  
147 the pineapple stem extract is loaded on maltodextrin, a hydrolysis product of starch, to  
148 simplify its handling. Thus, it contains carbohydrates like glucose and glucooligo-

149 saccharides that can react with primary amines of proteins to form Schiff-bases, which is  
150 presumably followed by an irreversible Amadori rearrangement (Figure S1) towards a stable  
151  $\alpha$ -amino ketone corresponding to advanced glycation end-products (17). This glycation  
152 results in a mass increase of 162 Da that was observed in the MS-spectrum (Figure 1B).  
153 The presence of two signals of +162 Da and +324 Da suggests that this reaction occurred  
154 twice on the protein or one disaccharide of maltose reacted. However, it is not clear if it is  
155 a statistical mixture or if two specific lysines were affected by this reaction (5 lysines are  
156 present in AcmJRL). It was not specified whether the AcmJRL isolated and crystallised by  
157 Azarkan *et al.* was also glycated. Inspection of the electron density map of crystallised  
158 AcmJRL (PDB: 6FLY (12)) did not show evidence for unassigned electron density which  
159 could also result from a high flexibility at the protein surface or a statistical distribution of  
160 the glycation.  
161

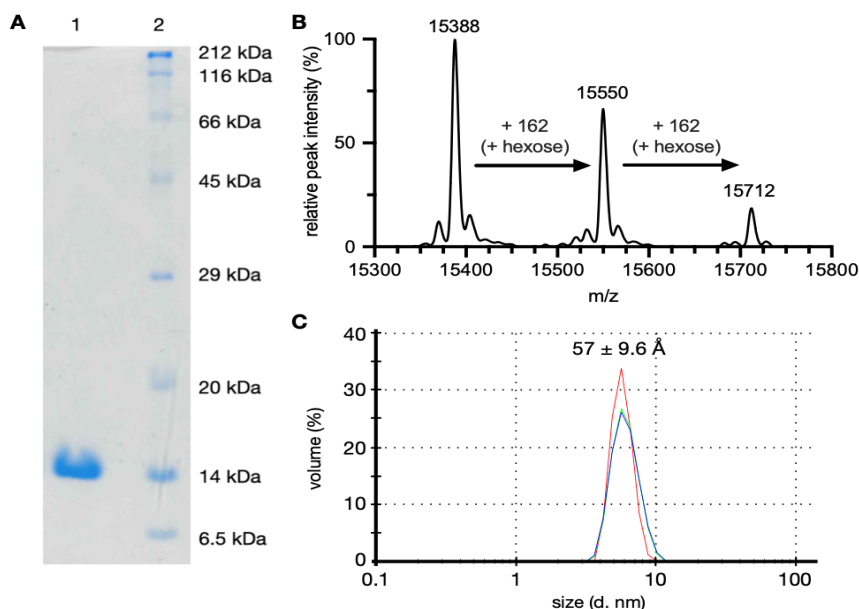

162  
163  
164 **Figure 1. A** Affinity purified AcmJRL (lane 1) and molecular weight marker (lane 2) analysed by SDS-PAGE  
165 (18%). **B** ESI-MS spectrum of AcmJRL after maximum entropy deconvolution. Main peak ( $m/z = 15388$ )  
166 corresponds to an acetonitrile adduct  $[M+H+MeCN]^+$ . Peaks at  $m/z = 15550$  and  $m/z = 15712$  most likely  
167 result from glycation (Figure S1). **C** Dynamic light scattering analysis of AcmJRL (size distribution by volume).  
168 Peak at  $57 \pm 9.6 \text{ \AA}$  indicates a dimerisation in solution.  
169

170 Previous studies showed dimerisation of AcmJRL in solution, determined by size exclusion  
171 chromatography and equilibrium unfolding experiments (12). However, Azarkan *et al.*  
172 showed that AcmJRL crystallises as a tetramer (see introduction). We therefore used  
173 dynamic light scattering (DLS) to determine the hydrodynamic diameter of AcmJRL in  
174 buffered solution (Figure 1C). The measured hydrodynamic diameter of  $57 \pm 9.6 \text{ \AA}$   
175 corresponds to the radius of the dimer (Figure S2), rather than to monomers or tetramers.  
176 Additionally, our differential scanning fluorimetry studies suggested two unfolding events  
177 at  $T_1 = 58 - 60^\circ\text{C}$  and  $T_2 = 73 - 74^\circ\text{C}$  (Figure S2) which could reflect dissociation of the  
178 dimer followed by protein denaturation.



## 179 **Glycan array analysis of AcMJRL**

180 In general, jacalin-related lectins can be clustered by their carbohydrate specificity into  
181 galactophilic and manno-/glucophilic subgroups. AcMJRL is reported to have a millimolar  
182 affinity towards mannosides and glucosides (12). Glycan microarrays (18) allow the  
183 simultaneous binding specificity analysis of carbohydrate-binding proteins on a library of  
184 oligosaccharides, using e.g. fluorescence-labelling for optical quantification.

185 Residues Lys50 and Lys63 are most accessible in AcMJRL for labeling with amine reactive  
186 dyes according to the solvent accessible protein surface calculated from the crystal  
187 structure (Figure S4). Fluorescence labelling with FITC resulted in a rather low labelling  
188 efficiency of 0.44. Since low labelling efficiency combined with high photobleaching of  
189 fluorescein could result in poor sensitivity, we shifted to the Cyanine-3 (Cy3) dye. The latter  
190 is a bright, photostable and pH-insensitive orange fluorescent dye. Unfortunately, Cy3-  
191 labelling via its NHS active ester also resulted in a low labelling efficiency of 0.55. Notably,  
192 one or two of the five lysines of AcMJRL are not available for labelling as they are blocked  
193 by glycation (Figure 1B). Further, the reduced accessibility of Lys6, Lys29 and Lys79 could  
194 explain the low labelling yields. On the other hand, only ca. 10% of AcMJRL is bis-  
195 glycosylated, 36% is mono-glycosylated and 54% is unmodified (Figure 1B).

196 To elucidate its glycan specificity on a larger collection of oligosaccharides, AcMJRL was  
197 analysed on the Consortium for Functional Glycomics mammalian glycan array (19) in an  
198 updated version with 585 distinct carbohydrate epitopes (Figure 2A, Tables S5 and S6). In  
199 agreement with its known mannose specificity, the lectin showed a high affinity towards  
200 several  $\alpha$ -mannosides (e.g. CFG-GLYCAN ID **310**, Man- $\alpha$ -1,6(Man- $\alpha$ -1,3)Man- $\alpha$ -1,6(Man-  
201  $\alpha$ -1,3)Man- $\beta$ , RFU =  $410 \pm 141$ ).

202 Bi- and triantennary mannosides showed higher apparent binding affinities towards  
203 AcMJRL than monovalent glycans (e.g. compare CFG-GLYCAN ID **312** vs. **207/209**). As  
204 described above, these oligomannosidic structures can be found in N-glycans of  
205 mammalian proteins and have been reported for viral surface proteins such as the SARS-  
206 CoV-2 spike protein. Increased binding by multivalent ligand presentation is common for  
207 glycan-lectin recognition. The mannotriose epitope Man- $\alpha$ -1,6(Man- $\alpha$ -1,3)Man (commonly  
208 present in CFG-GLYCAN ID **211**, **51** and **50**), the mannopentaose epitope Man- $\alpha$ -1,6(Man-  
209  $\alpha$ -1,3)Man- $\alpha$ -1,6(Man- $\alpha$ -1,3)Man (commonly present in in CFG-GLYCAN ID **310** and **214**)  
210 and the mannohexaose epitope Man- $\alpha$ -1,6(Man- $\alpha$ -1,3)Man- $\alpha$ -1,6(Man- $\alpha$ -1,2-Man- $\alpha$ -  
211 1,3)Man (present in GFG-GID **213**) showed highest binding responses which corresponded  
212 to reported data ( $K_d$  mannotriose = 1.4 mM,  $K_d$  mannopentaose = 590  $\mu$ M) (12). One single  
213 glycan hit without mannose but a terminal  $\beta$ -galactoside in a LacNAc repeat (CFG-GLYCAN  
214 ID **285**, Figure 2A) is presumably a false positive due to dose-independent changes in signal  
215 intensity (5 vs 50  $\mu$ g/mL).

216 AcMJRL forms a dimer in solution and can bind up to two mannosides per binding site.  
217 The distance from the binding site of one monomer to the other monomer in the crystal  
218 structure is approx. 46-50 Å. The distance between the anomeric carbons of two  
219 mannosides within one binding site is approx. 14 Å (from C1 to C1), which is similar to the

220 distance between two mannoses in mannopentaose suggesting a possible chelation  
 221 binding mode by this ligand. On the other hand, mannopentaose could also preorganise  
 222 two  $\alpha$ -mannosides in a way that allows the rapid rebinding with the two binding sites within  
 223 one monomer.

224

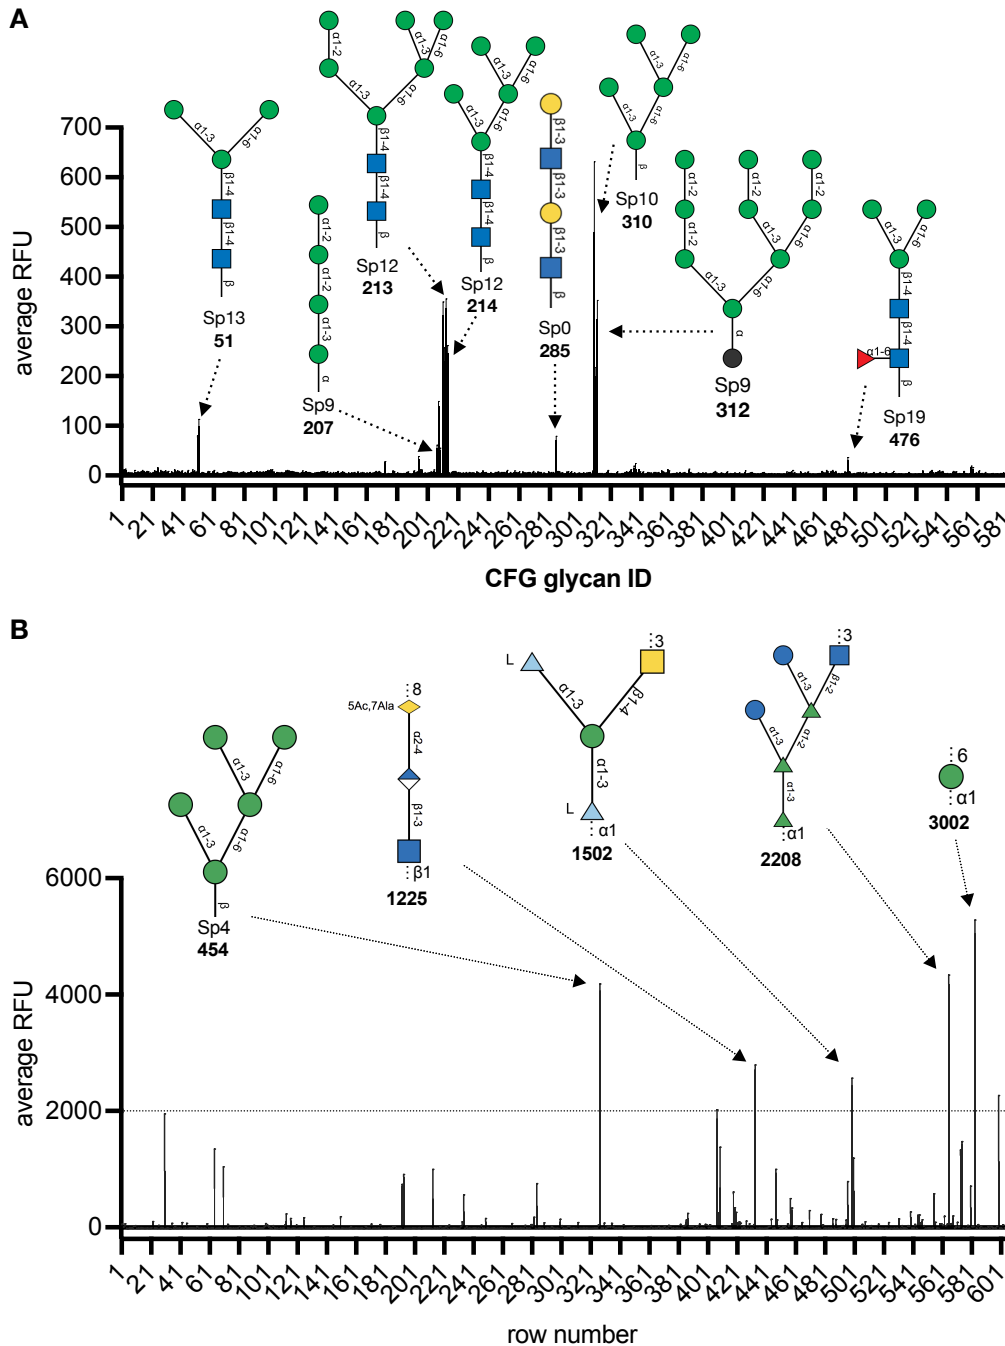

225

226

227 **Figure 2.** Glycan array analysis of AcMJRL: **A** CFG mammalian glycan array tested with FITC-labeled AcMJRL  
 228 at 50  $\mu\text{g}/\text{mL}$ , **B** Semiotic glycan array tested with Cy3-labeled AcMJRL at 20  $\mu\text{g}/\text{mL}$ . Data is presented as  
 229 average RFU  $\pm$  s.d. from 6 replicates on array. RFU intensities differ between arrays since different  
 230 fluorophores, protocols and scanners were used. **Number** = glycan ID. Translation from row number to  
 231 Semiotik glycan ID and short name can be found in tables S1 and S2.

232 Monovalent  $\alpha$ -glucosides showed very low, but significant binding (e.g. CFG-GLYCAN ID  
233 **195**, Glc- $\alpha$ -1,4-Glc- $\beta$ , RFU =  $33 \pm 5$ ). Unfortunately, no multivalent glucosides are available  
234 on this array to understand the influence of multivalency for these epitopes.

235 In addition to the CFG glycan array, we analysed AcmJRL on the Semiotik glycan array(20),  
236 which also features mammalian glycans and additionally a large variety of other glycans,  
237 mainly from bacterial species (Figure 2B). Although mannopentaose (Semiotik glycan ID  
238 (SGID) **454**) and poly-Man- $\alpha$ -1,6 (mannan, SGID **3002**) could be confirmed as a ligand for  
239 AcmJRL, the smaller mannotriose (SGID **258**) showed no binding, arguably due to a shorter  
240 linker length (Sp4) preventing accessibility for the protein. In contrast to the CFG glycan  
241 array, a multivalent  $\alpha$ -glucoside is present on the Semiotik chip (SGID **2208**) and was well  
242 recognized by the lectin, underlining the affinity of AcmJRL towards  $\alpha$ -glucosides.  
243 Interestingly, two unrelated bacterial O-antigens were also recognised: *E. coli* O161 (SGID  
244 **1225**, -8(D-Ala1,7)Leg5Ac- $\alpha$ -2,4-GlcA- $\beta$ -1,3-GlcNAc- $\beta$ 1-) and *A. hydrophila* O34deAc  
245 (SGID **1502**, -3GalNAc- $\beta$ -1,4(L-6dTal- $\alpha$ -1,3)Man- $\alpha$ -1,3L-6dTal- $\alpha$ -1-). However, SGID **1502**  
246 showed a nonlinear dose-response, which requires orthogonal binding assays for  
247 verification.

248

## 249 Development of a competitive binding assay for AcmJRL

250 Glycan arrays provide valuable insight into carbohydrate specificity in high-throughput. For  
251 a quantitative binding analysis, we developed a solution phase competitive binding assay  
252 based on our previous work for other lectins using fluorescence polarisation (21, 22, 23).  
253 Fluorescein-labelled  $\alpha$ -D-mannoside **1** (24) was titrated with AcmJRL and a  $K_d$  of  $58.9 \pm 5.9$   
254  $\mu$ M was determined (Figure 3). This rather high affinity of AcmJRL for this  $\alpha$ -mannoside was  
255 surprising, compared to the lectin's reported affinity towards the previously best known  
256 ligand manno-1,3-mannan ( $K_d = 2.4$  mM (12)). Interestingly, such a discrepancy  
257 between the weaker carbohydrate alone and a boost in binding affinity for its fluorophore-  
258 labeled derivative was already observed for the bacterial lectin PIIA ( $K_d = 62.7$   $\mu$ M and  $K_d$   
259  $520$   $\mu$ M, for FITC-modified  $\alpha$ -D-Gal and Me- $\alpha$ -D-Gal, respectively) (24).

260

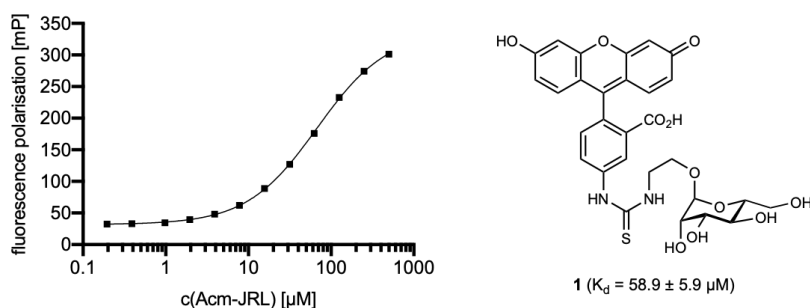

261

262

263 **Figure 3.** Direct binding of AcmJRL to mannose-based fluorescent ligand **1** and quantification using  
264 fluorescence polarisation. Dissociation constant and standard deviations were obtained from three  
265 independent experiments of triplicates on each plate.



266 This system was used to screen several carbohydrates in competitive binding assays. Next  
267 to the carbohydrate hits D-mannose and D-glucose and the two non-recognised epitopes  
268 D-galactose and L-fucose from the glycan arrays, other plant carbohydrates like L-  
269 rhamnose (Rha), D-xylose (Xyl) and D-arabinose (Ara) were tested (Figure 4A). First, single  
270 concentration inhibition assays again confirmed the affinity of AcmJRL towards  $\alpha$ -  
271 mannosides and  $\alpha$ -glucosides (Figure 4A). Additionally, glucosamine (GlcN) and *N*-acetyl-  
272 glucosamine (GlcNAc) were confirmed as ligands. In accordance with the glycan array  
273 results, none of the other tested carbohydrates inhibited AcmJRL at 10 mM. In order to  
274 evaluate the influence of the glycosidic linkage of the oligomannosides ( $\alpha$ -1,2 vs  $\alpha$ -1,3 vs  
275  $\alpha$ -1,6), a titration of the appropriate dimannosides was performed. Only subtle affinity  
276 differences between the isomers could be observed (Figure 4B,  $IC_{50}$  (Man- $\alpha$ -1,2-Man) =  $9.1$   
277  $\pm 0.8$  mM,  $IC_{50}$  (Man- $\alpha$ -1,6-Man) =  $11.3 \pm 1.7$  mM), with Man- $\alpha$ -1,3-Man ( $IC_{50}$  =  $6.9 \pm 0.6$   
278 mM) having the highest potency. Comparing the glycan array results with this finding could  
279 explain why mannopentaose which contains two Man- $\alpha$ -1,3-Man-epitopes was  
280 preferentially recognised over other bis-(Man- $\alpha$ -1,2-Man)-presenting epitopes (e.g. CFG-  
281 GLYCAN ID **208**). Interestingly, Me- $\alpha$ -D-glucoside ( $IC_{50}$  =  $6.8 \pm 0.5$  mM) showed higher  
282 affinity towards AcmJRL than Me- $\alpha$ -D-Man ( $IC_{50}$  =  $10.8 \pm 1.8$  mM) and the di-mannosides  
283 (Figure 4B). Furthermore, from our single point inhibition experiments it is evident that the  
284 glycosidic linkage in glucosides is crucial for recognition by AcmJRL: maltobiose (Glc- $\alpha$ -  
285 1,4-Glc) showed highest inhibition, whereas cellobiose (Glc- $\beta$ -1,4-Glc) had no effect.

286

### 287 **Expression of SARS-CoV-2 Spike Protein**

288 Given the potential antiviral properties of plant lectins, our characterisation of AcmJRL  
289 made us speculate about the binding of AcmJRL to the heavily glycosylated SARS-CoV-2  
290 spike protein.

291 The spike-protein of SARS-CoV-2 was recombinantly produced in HEK293 cells using a  
292 pCAGGS-based eukaryotic vector system yielding 1.42 mg glycoprotein from one batch of  
293 560 mL. Identity and purity of the protein were determined by gel electrophoresis (Figure  
294 5A) and mass spectroscopy (Figure 5B). Both experiments coherently show a molecular  
295 weight around 145 kDa. Interestingly, mass spectroscopy revealed four major masses after  
296 maximum entropy (MaxEnt) deconvolution of the centroided mass spectrum, each  
297 separated by approximately 2 kDa (Figure 5B). As described above, S-protein usually  
298 exhibits highly complex glycosylation, which leads to a non-homogeneous sample.  
299 Therefore, the heterogeneous mass distribution determined by ESI-MS presumably  
300 resulted from the presence of different glycoforms.

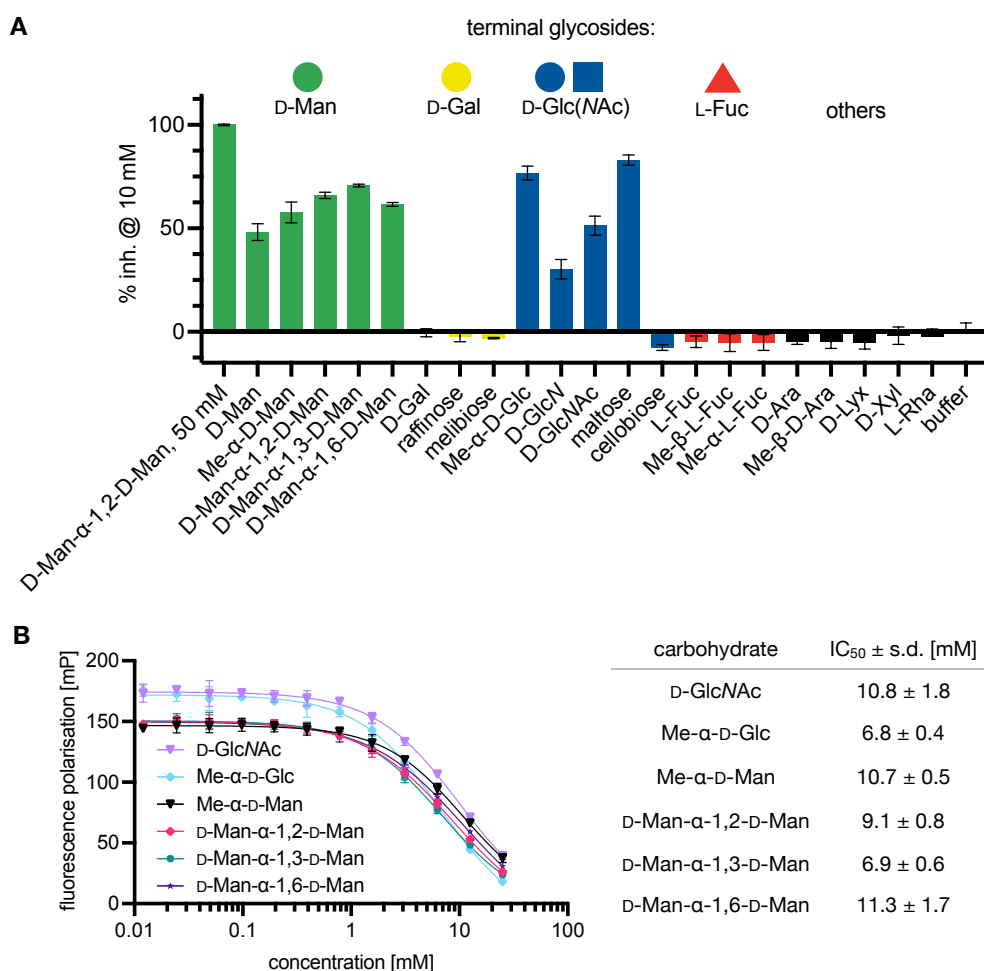

301  
302  
303  
304  
305  
306  
307

**Figure 4.** Competitive binding of various carbohydrate ligands to AcmJRL: **A** Inhibition of AcmJRL by a carbohydrate panel at 10 mM. Fluorescence polarisation in presence of 50 mM Man-α1,2-Man was defined as 100% inhibition. **B** Dose-response curves of AcmJRL with differently linked mannosides (left) or Me-α-Glc, GlcNAc. Data is shown as mean ± s.d. from technical triplicates on plate.

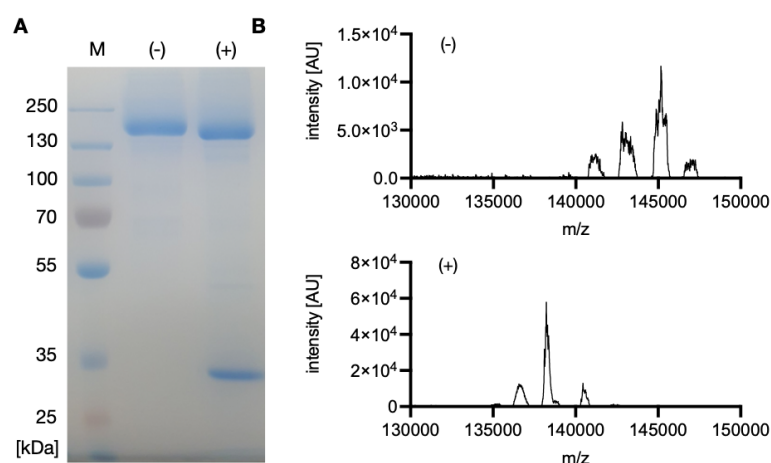

308  
309  
310  
311  
312  
313

**Figure 5.** **A** SDS-PAGE (10%) of native S-protein (-) and S-protein digested with PNGase F (+). **B** Deconvoluted mass spectrum of native S-protein (-) and S-protein digested with PNGase F (+). In both experiments, a mass shift of several kDa is visible after treatment with PNGase F indicating removal of N-glycans.

314 Peptide-N-glycanase F (PNGase F) is an amidase that specifically hydrolyses amide bonds  
315 between the reducing end GlcNAc and asparagine residues of *N*-glycans. Consequently,  
316 PNGase F was used to verify the glycosylation of the recombinantly produced *N*-  
317 glycosylated S-protein. S-protein was incubated in the presence of PNGase F and  
318 compared with the untreated protein sample (Figure 5). In fact, the treatment resulted in a  
319 faster migration on the SDS-gel indicating a molecular weight reduced by several kDa  
320 (Figure 5A). Coherently, the MaxEnt deconvoluted mass spectrum of the treated S-protein  
321 shows one major peak around 138 kDa, together with two small satellite peaks. Notably,  
322 all mass peaks of the PNGase F-treated species were much sharper and reached higher  
323 signal intensities compared to the native protein. The lower intensity of the deconvoluted  
324 mass peaks of the untreated protein in comparison to the higher intensity of the  
325 deconvoluted mass peaks of the PNGase F-treated protein indicated that a smaller  
326 diversity of glycoprotein species is existent in the deglycosylated sample while in the  
327 glycosylated native sample, the presence of a complex mixture of different glycoforms is  
328 responsible for the lower peak intensities due to the lower abundance of each individual  
329 species. The most intense peak in the deconvoluted mass spectra reveals a mass shift of  
330 approximately 7 kDa, resulting in a main mass peak around 138 kDa. Therefore, the mass  
331 spectrometric analysis of the enzyme treated sample qualitatively confirmed an extensive  
332 glycosylation of the recombinantly produced glycoprotein.

333

#### 334 **Mannose-dependence of AcmJRL binding to SARS-CoV-2 spike-protein**

335 After verification of the S-protein identity, a biophysical assay for determination of binding  
336 kinetics and affinity of AcmJRL to the S-protein was established. Given the high molecular  
337 weights of both interaction partners, Surface Plasmon Resonance (SPR) analysis was  
338 chosen to determine binding affinity and kinetics of AcmJRL against immobilised S-protein.  
339 Single cycle kinetics were performed by injecting AcmJRL at increasing concentrations  
340 from 2.5 to 20  $\mu\text{M}$  onto a sensor chip with immobilised S-protein and a dose-dependent  
341 response was observed. Even at the highest concentration, saturation could not be  
342 observed after 120 sec association, hinting at an extensive number of available binding  
343 sites for AcmJRL. In addition, only an incomplete dissociation was recorded during the  
344 dissociation phases. The association rate ( $k_{on}$ ) was  $1057 \pm 94 \text{ M}^{-1}\text{s}^{-1}$ , the dissociation rate  
345 ( $k_{off}$ ) was  $3.42 \pm 0.4 \times 10^{-3} \text{ s}^{-1}$  which corresponds to a  $K_D$  of  $3.27 \pm 0.5 \mu\text{M}$ . A similar  $K_D$  of  
346  $11.1 \pm 2.5 \mu\text{M}$  was determined after fitting the response after 115 sec contact time of the  
347 association with the Langmuir isotherm, which is more error prone due to the fact that  
348 saturation was not reached.

349 Interestingly, the  $K_D$  increased gradually for each single experiment performed for the  
350 technical replicates. (Dissociation constants calculated from Langmuir isotherm: 7.9  $\mu\text{M}$ ,  
351 11.5  $\mu\text{M}$ , 14.0  $\mu\text{M}$ ; Dissociation constants calculated from rate constants: 2.7  $\mu\text{M}$ , 3.1  $\mu\text{M}$ ,  
352 4.0  $\mu\text{M}$ ). This observation likely resulted from some AcmJRL remaining bound during the  
353 regeneration cycles as the S-protein has a vast number of possible binding sites in its  
354 numerous *N*-glycans for AcmJRL. Furthermore, during dissociation phases the RU  
355 (response units) values did not fully decrease to the baseline response, indicative for an  
356 incomplete dissociation of AcmJRL.

357 As AcmJRL interacts with the mannose epitope (Man- $\alpha$ -1,6(Man- $\alpha$ -1,3)Man, present in  
 358 CFG glycan ID **211**, **213**, **51** and **50**) in the glycan array analysis, single cycle kinetics of  
 359 AcmJRL with the addition of 10 mM mannose in the sample buffer were also conducted  
 360 to analyse the glycan-dependence of the AcmJRL-spike binding. The loss of observable  
 361 binding to the spike protein in presence of the competitor demonstrates the mannose-  
 362 dependent binding of AcmJRL (Figure 6).

363

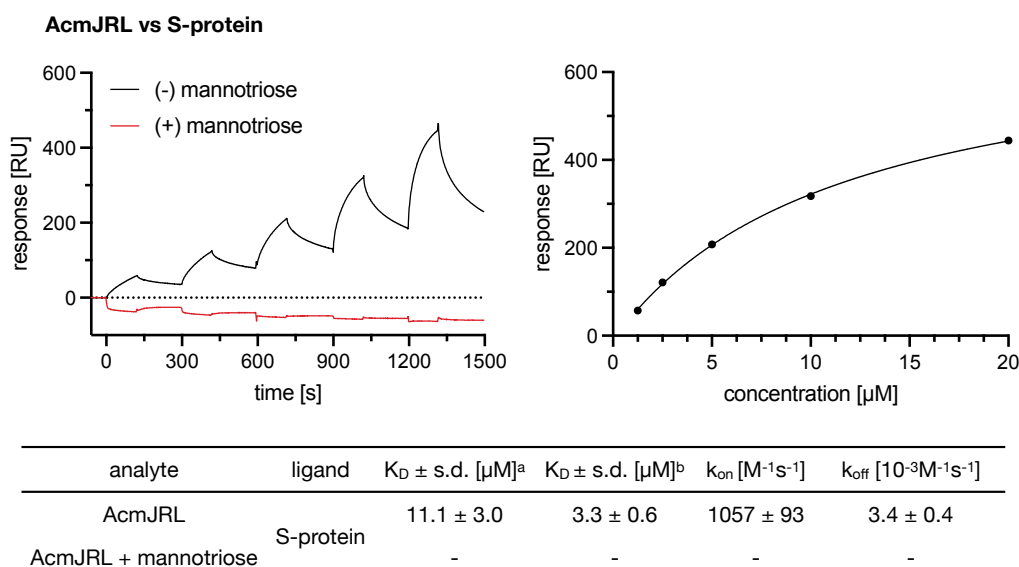

364

365

366 **Figure 6.** Surface plasmon resonance (SPR) sensorgrams of the binding of AcmJRL to immobilised S-protein  
 367 in absence (black) and in presence of 10 mM mannose (Man- $\alpha$ -1,6(Man- $\alpha$ -1,3)Man, red). Langmuir graph  
 368 of AcmJRL binding to S-protein. Dissociation constant calculated from <sup>a</sup>Langmuir isotherm or <sup>b</sup>rate constants,  
 369  $K_D = k_{off}/k_{on}$ .

370

### 371 **AcmJRL binds to SARS-CoV-2 spike RBD and to its native receptor ACE2**

372 The RBD of the S-protein is essential for the SARS-CoV-2 infection process, as it mediates  
 373 binding to the human cell surface receptor ACE2, allowing the attachment of the virus. As  
 374 we observed the binding of AcmJRL to the S-protein, we set out to determine if the lectin  
 375 is able to block this essential mechanism for the infection through binding to the spike  
 376 protein. Complex glycosylation is present in many other human cell surface proteins, such  
 377 as the receptor ACE2.

378 Consequently, we also analysed the binding of AcmJRL to ACE2 as well as to spike RBD  
 379 produced for interaction studies. Single cycle kinetics on SPR were performed for AcmJRL  
 380 binding to both the S-protein RBD and the human ACE2 receptor (Figure 7). Twentyone  
 381 glycosylation sites are present in full length S-protein (per monomer, 63 in the trimeric form)  
 382 literally leading to a sweet fur covering the entire spike (25, 26), two of which reside within  
 383 its RBD (5). The observed association of AcmJRL to S-protein RBD reflects this reduced  
 384 glycosylation well, as saturation was now reached during association. The determined  $K_D$   
 385 value of  $12.9 \mu\text{M}$  from kinetics or  $35 \mu\text{M}$  from the Langmuir plot is about threefold higher  
 386 compared to its interaction with full length S-protein. The association kinetics ( $k_{on} = 1490 \pm$

387 455 M<sup>-1</sup>s<sup>-1</sup>) were comparable to those for AcmJRL binding to S-protein (Figure 6). However,  
 388 the dissociation of AcmJRL from spike RBD is about fourfold faster, displayed in the  
 389 determined  $k_{off} = 19.4 \pm 6.7 \times 10^{-3} \text{ M}^{-1}\text{s}^{-1}$ , a consequence of the reduced extent of  
 390 glycosylation of the RBD.

391

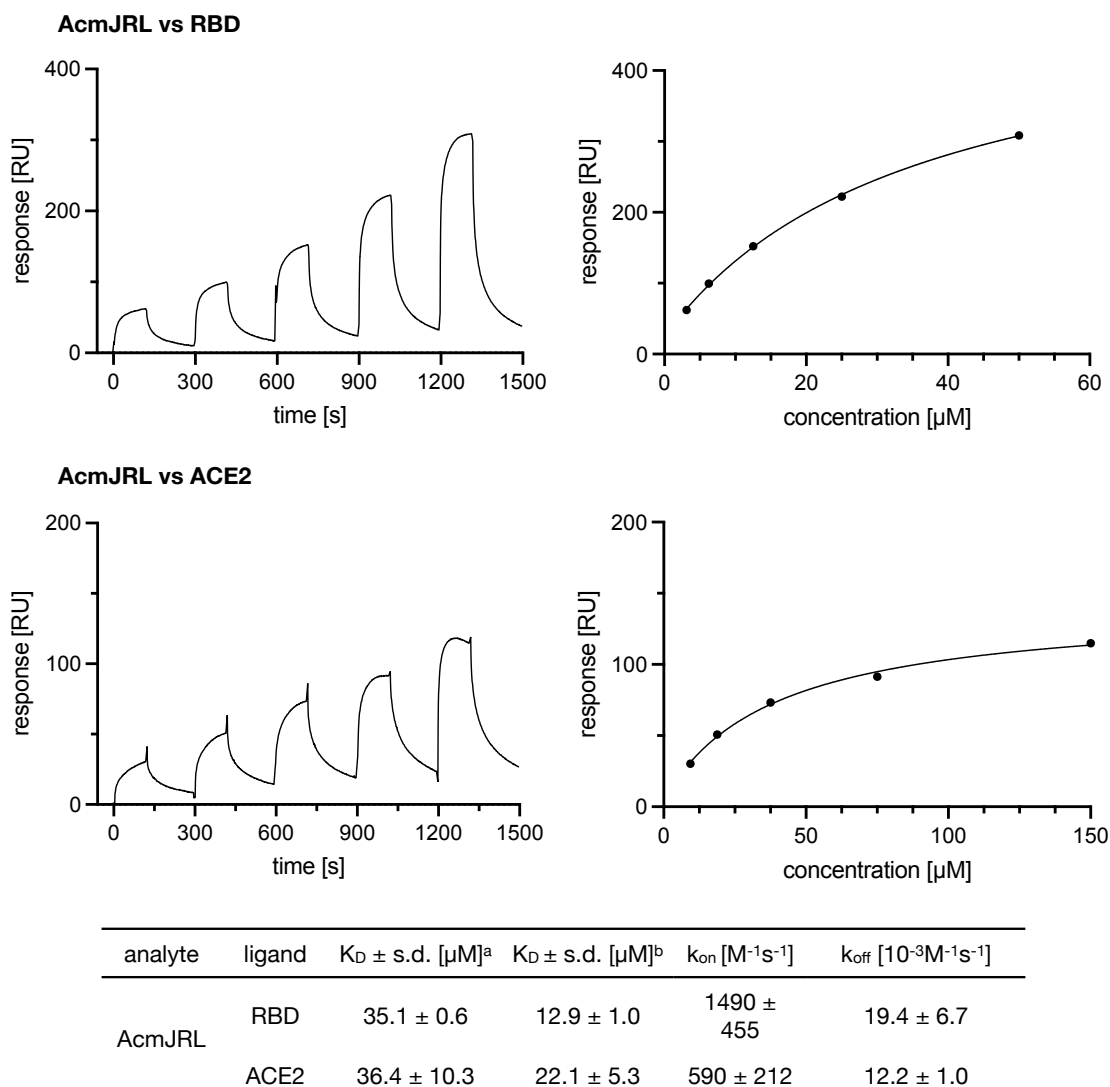

392

393

394 **Figure 7.** Surface plasmon resonance (SPR) sensorgrams with Langmuir graphs of the binding of AcmJRL to  
 395 S-protein RBD (top) and ACE2 receptor (bottom). Dissociation constant calculated from <sup>a</sup>Langmuir isotherm  
 396 or <sup>b</sup>rate constants,  $K_D = k_{off}/k_{on}$ .

397

398 Human ACE2 is also highly glycosylated, carrying more matured complex glycans  
 399 compared to the high-mannose enriched virus surface protein (27). From SPR analysis of  
 400 AcmJRL binding to immobilised recombinant ACE2 produced in HEK293 cells, we obtained  
 401 a  $K_D$  value of  $22.1 \pm 5.3 \mu\text{M}$  calculated from the Langmuir isotherm, which is sevenfold  
 402 higher than the one obtained for binding to the S-protein. This observation could be a direct  
 403 result of the altered glycosylation pattern of this human receptor that is distinct from the  
 404 viral proteins. The association rate of AcmJRL to ACE2 ( $k_{on} = 590 \pm 212 \text{ M}^{-1}\text{s}^{-1}$ ) was also  
 405 slower compared to the one for the S-protein. Further, the threefold higher dissociation rate



406 ( $k_{off} 12.2 \pm 1.0 \times 10^{-3} \text{ M}^{-1}\text{s}^{-1}$ ) of AcmJRL from the ACE2 receptor indicates a faster  
 407 dissociation of the complex. In contrast to the interaction with full length S-protein,  
 408 complete dissociation of AcmJRL from both the RBD and ACE2 complexes was observed.  
 409 The observed affinity of AcmJRL for both S-protein and ACE2 could therefore result in a  
 410 synergistic inhibitory effect on viral cell entry.

### 411 412 **AcmJRL weakens the interaction of spike RBD with ACE2**

413 The interaction between the spike RBD and its ACE2 receptor is characterised by  
 414 nanomolar affinity and is essential for the infection process. As AcmJRL binds the S-protein  
 415 RBD and ACE2 with low micromolar affinity, it is likely that the spike interaction with ACE2  
 416 could be inhibited by AcmJRL. To test this hypothesis, we first reproduced the affinity  
 417 reported for the S-protein RBD to the immobilised ACE2 receptor (Figure 8) by SPR and  
 418 obtained a  $K_D$  of 10.9 nM (28).

419

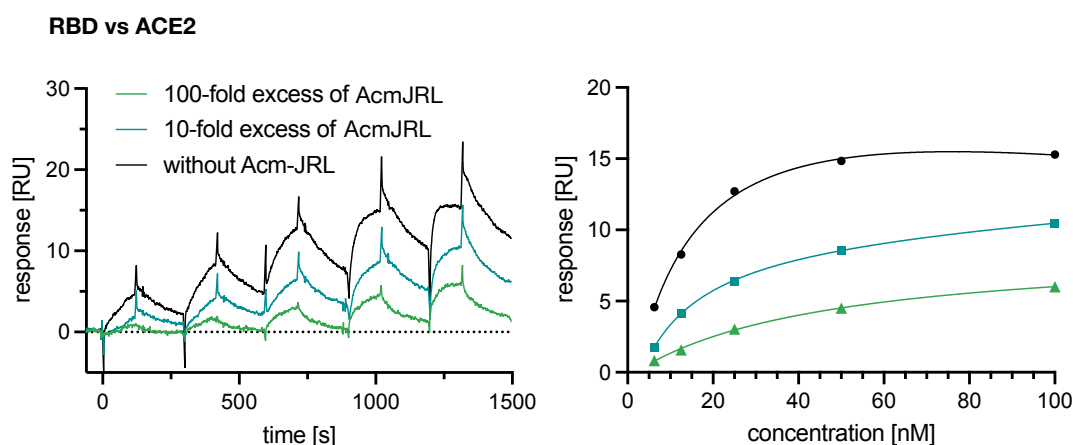

| analyte                         | ligand | $K_D \pm \text{s.d. [nM]}^a$ | $K_D \pm \text{s.d. [nM]}^b$ | $k_{on} [\times 10^3 \text{ M}^{-1}\text{s}^{-1}]$ | $k_{off} [10^{-3}\text{M}^{-1}\text{s}^{-1}]$ |
|---------------------------------|--------|------------------------------|------------------------------|----------------------------------------------------|-----------------------------------------------|
| RBD                             |        | < 6.25                       | $10.9 \pm 2.4$               | $414 \pm 104$                                      | $4.5 \pm 1.2$                                 |
| RBD + 10-fold excess of AcmJRL  | ACE2   | $17.1 \pm 3.8$               | $21.1 \pm 2.9$               | $350 \pm 176$                                      | $7.2 \pm 3.1$                                 |
| RBD + 100-fold excess of AcmJRL |        | $45.0 \pm 3.9$               | $37.1 \pm 4.7$               | $270 \pm 18$                                       | $10.1 \pm 1.9$                                |

420  
 421 **Figure 8.** Surface plasmon resonance (SPR) sensorgrams and corresponding affinity plots for the binding of  
 422 S-protein RBD against immobilised ACE2 (black). Prior to injection, S-RBD was also preincubated with 10-  
 423 fold (blue) or 100-fold (green) excess of AcmJRL. Dissociation constants calculated from <sup>a</sup>Langmuir isotherm  
 424 or <sup>b</sup>rate constants,  $K_D = k_{off}/k_{on}$ .

425

426 The influence of AcmJRL on the affinity of S-protein RBD binding to the ACE2 receptor was  
 427 studied by an addition of AcmJRL with a molar excess of lectin (factor 10 and 100, i.e. 1  
 428  $\mu\text{M}$  and 10  $\mu\text{M}$  Figure 8) to the RBD and preincubation prior to injection. Then, a single  
 429 cycle kinetics run with injections of 5 dilutions (6.25 nM RBD with 10 and 100 fold excess  
 430 AcmJRL – 100 nM RBD with 10 and 100 fold excess AcmJRL) of the RBD-AcmJRL mixture  
 431 was performed with immobilised ACE2 receptor. Although residual binding of RBD to ACE2  
 432 receptor could still be observed (Figure 8), its apparent affinity was reduced by a factor of  
 433 two ( $K_D = 21.1 \pm 2.9 \text{ nM}$ ) after preincubation with a 10-fold excess of AcmJRL. An increase

434 to a 100-fold excess of preincubated AcmJRL led to another twofold decrease in  $K_D$  value  
435 to  $37.1 \pm 4.7$  nM. This rather moderate inhibitory effect probably resulted from the dilution  
436 of the preincubation mixture into the different injected concentrations, resulting in AcmJRL  
437 concentrations below the determined  $K_D$ s of AcmJRL for spike RBD and ACE2. The  
438 addition of sufficiently high concentrations of AcmJRL to saturate RBD could not be used  
439 to overcome this problem, since AcmJRL also directly binds to the glycans of the  
440 immobilized ACE2 impacting on the recorded SPR response.

441 In a clinical scenario, saturating both the glycans of ACE2 and spike with AcmJRL could  
442 be beneficial to weaken the virus-host interaction and provide the immune system with an  
443 added advantage while battling the infection.

444

## 445 **Conclusion and Outlook**

446

447 The current SARS-CoV-2 pandemic is a serious crisis that urgently asks for therapeutic  
448 treatment options. The viral envelope of SARS-CoV-2 is densely covered by the highly  
449 glycosylated spike protein, which is essential for viral cell entry via binding to the ACE2  
450 receptor.

451 In this work, the pineapple-derived jacalin-related lectin AcmJRL was purified from the  
452 active pharmaceutical ingredient bromelain and characterised by mass spectrometry,  
453 differential scanning fluorimetry and dynamic light scattering. We further analysed the  
454 lectin's ligand specificity by glycan array analysis using two complimentary arrays. The data  
455 further supported the previously reported preference of AcmJRL for mannopentose. A  
456 solution phase binding assay was subsequently developed to quantify AcmJRL-  
457 carbohydrate interactions.

458 Then, the interaction of AcmJRL to recombinantly produced SARS-CoV-2 spike protein  
459 was studied by surface plasmon resonance analysis. The low  $\mu$ M binding was  
460 carbohydrate-dependent and could be inhibited by supplementation with mannotriose.  
461 Finally, we could show that addition of AcmJRL reduced the tight binding affinity of the  
462 spike RBD for the human ACE2 receptor. Thus, bromelain and specifically its component  
463 AcmJRL could constitute a novel antiviral drug to neutralise SARS-CoV-2 post exposure.

464

## 465 **Acknowledgements**

466

467 The authors are thankful to Ursapharm (Saarbrücken, Germany) for funding parts of this  
468 work. We are indebted to Dr. Jamie Heimburg-Molinaro and Kelly Baker for the CFG glycan  
469 array analysis and we acknowledge the participation of the Protein-Glycan Interaction  
470 Resource of the CFG and the National Center for Functional Glycomics (NCFG) at Beth  
471 Israel Deaconess Medical Center, Harvard Medical School (supporting grant R24  
472 GM137763). Furthermore, we would like to express our gratitude to Dr. Nadya Shilova from  
473 Semiotik (Moscow, Russia) for helpful suggestions for analyzing the Semiotik array. Further,  
474 we thank Alexandra Amann and Stefanie Neuber for performing cell culture experiments.

## 475 **Materials and Methods**

476

477 Bromelain was supplied by Ursapharm (Saarbrücken, Germany). Mannotriose (> 95%), Me-  
478  $\alpha$ -L-Fuc (> 98%), Me- $\beta$ -L-Fuc (> 98%) were obtained from Carbosynth Ltd (UK); D-  
479 glucosamine, D-mannose, D-galactose, D-Man- $\alpha$ -1,2- D-Man, D-Man- $\alpha$ -1,3- D-Man and D-  
480 Man- $\alpha$ -1,6- D-Man were obtained from Dextra Laboratories Ltd. (UK); Me- $\alpha$ -D-Glc ( $\geq$  99%)  
481 and D-xylose ( $\geq$  99) was obtained from Sigma-Aldrich Chemie GmbH (Germany); ; Me- $\beta$ -D-  
482 Ara (> 99%) and maltose (> 98) were obtained from TCI Europe (Belgium); cellobiose  
483 ( $\geq$ 98%) was obtained from Carl Roth (Germany); L-rhamnose (> 99%) was obtained from  
484 AppliChem GmbH (Germany); melibiose was obtained from Alfa Aesar (UK); D-lyxose was  
485 obtained from Acros Organics (Belgium) and N-acetyl D-glucosamine was obtained from  
486 MP Biomedicals (France); raffinose (> 99%) was obtained from Th. Geyer GmbH & Co. KG  
487 (Germany); D-arabinose (> 98%) was obtained from Abcam (UK); L-fucose was obtained  
488 from Jennewein Biotechnologie GmbH (Germany).

489

### 490 **Preparation of D-mannosylated sepharose**

491 D-Mannosylated sepharose was synthesised according to the protocol of Fornstedt and  
492 Porath(16): Sepharose CL-6B beads (Sigma-Aldrich Chemie GmbH, Germany, 15 mL) were  
493 suspended in Na<sub>2</sub>CO<sub>3</sub>-buffer (500 mM, pH 11, 15 mL). Divinylsulfone (1.5 mL) was added  
494 and the suspension was stirred at r.t. for 70 min. Activated sepharose was extensively  
495 washed with water and resuspended in 15 mL aqueous D-mannose solution (20% m/v, 500  
496 mM Na<sub>2</sub>CO<sub>3</sub>, pH 10). The reaction was stirred over night at r.t., filtered and extensively  
497 washed with water. Unreacted activated sepharose was quenched by addition of  $\beta$ -  
498 mercaptoethanol (300  $\mu$ L) in buffer (15 mL, 500 mM NaHCO<sub>3</sub>, pH 8.5) for 120 min. After  
499 filtration and washing of the mannosylated beads, they were filled into 5 mL plastic columns  
500 for affinity chromatography.

501

### 502 **Isolation of AcmJRL from bromelain**

503 AcmJRL was isolated in analogy to the protocol of Azarkan *et al.*<sup>(12)</sup>. Bromelain powder (28  
504 g) was suspended in an Erlenmeyer flask in buffer (400 mL, 100 mM NaOAc pH 5, 1 mM  
505 EDTA, 20 mM methyl methanethiosulfonate) and stirred for 60 min at r.t.. After  
506 centrifugation (30,000 rcf, 30 min, 4 °C), the supernatant was dialysed twice for 1 h against  
507 4 L Tris-buffered saline (TBS: 150 mM NaCl, 50 mM Tris pH 7.4). The sample was loaded  
508 on a D-mannosyl-sepharose column pre-equilibrated with the dialysis buffer. After  
509 extensive washing, the lectin was eluted with 1 M D-mannose in buffer. Eluted fractions  
510 containing AcmJRL were pooled and dialysed against TBS (5 x 3 h against 2 L). The yield  
511 (31 mg) was determined by UV-absorption at 280 nm (MW = 15.34 kDa,  $\epsilon$  = 19940 M<sup>-1</sup> x  
512 cm<sup>-1</sup>).

513

### 514 **Intact protein mass determination**

515 Intact protein mass measurements for AcmJRL were performed on a Dionex Ultimate 3000  
516 RSLC system using an Aeris Widepore XB C8, 150 x 2.1 mm, 3.6  $\mu$ m dp column  
517 (Phenomenex, USA). Separation of a 2  $\mu$ L sample was achieved by a linear gradient from

518 (A) H<sub>2</sub>O + 0.1% formic acid to (B) MeCN + 0.1% formic acid at a flow rate of 300 µL/min  
519 and 45 °C. The gradient was initiated by a 1 min isocratic step at 2% B, followed by a linear  
520 increase to 75% B in 10 min to end up with a 3 min step at 75% B before re-equilibration  
521 with initial conditions. UV spectra were recorded on a DAD in the range from 200 to 600  
522 nm. The LC flow was split to 37.5 µL/min before entering the maXis 4G hr - ToF mass  
523 spectrometer (Bruker Daltonics, Bremen, Germany) using the standard Bruker ESI source.  
524 In the source region, the temperature was set to 200 °C, the capillary voltage was 4000 V,  
525 the dry-gas flow was 5.0 L/min and the nebuliser was set to 1.0 bar. Mass spectra were  
526 acquired in positive ionisation mode ranging from 150 – 2500 *m/z* at 2.0 Hz scan rate.  
527 Protein masses were deconvoluted by using the Maximum Entropy algorithm (Spectrum  
528 Square Associates, Inc.).

529

### 530 **Dynamic light scattering**

531 Dynamic light scattering (DLS) measurements were performed on a Zetasizer Nano-ZS  
532 (Malvern Instruments, UK). Protein solutions were filtered with a syringe filter (0.45 µm)  
533 before measurements. AcmJRL (14 µM) was measured in TBS (150 mM NaCl, 50 mM Tris  
534 pH 7.4) at 25 °C.

535

### 536 **Differential scanning fluorimetry**

537 20 µL of a solution containing AcmJRL (20 µM) and SyproOrange (final concentration 10x  
538 of a 5000x stock in DMSO, Sigma-Aldrich, Germany) in TBS (150 mM NaCl, 50 mM Tris pH  
539 7.4) was added to a white semi-skirted 96-well plate (Thermo Fisher) in triplicates. The  
540 melting curve measurements (25 – 95 °C, 0.5 °C/min) were performed and analysed on a  
541 real time PCR instrument (StepOnePlus, Applied Biosystems).

542

### 543 **Direct binding of fluorescent mannoside ligand 1 to AcmJRL**

544 Fluorescent ligand **1**(24) was dissolved in DMSO, then diluted to a final concentration of  
545 200 nM in TBS (150 mM NaCl, 50 mM Tris pH 7.4). AcmJRL was concentrated (Vivaspin  
546 column, 10,000 MWCO, Sartorius Stedim Biotech GmbH, Germany) to a concentration of  
547 1.33 mM in TBS. After centrifugation (10 min, 25,000 rcf, r.t.), the concentration of AcmJRL  
548 was adjusted to 1 mM as determined by UV absorbance measurement at 280 nm ( $\epsilon =$   
549  $19,940 \text{ M}^{-1} \text{ cm}^{-1}$ ). A serial dilution of AcmJRL was dispensed in triplicates (10 µL each) in a  
550 black 384-well plate (Greiner Bio-One, Germany, cat no 781900). The solution of the  
551 fluorescent ligand (10 µL) was added to yield a final concentration of 100 nM. After  
552 incubation for 1 h at r.t., fluorescence (excitation 485 nm, emission 535 nm) was measured  
553 in parallel and perpendicular to the excitation plane on a PheraStar FS plate reader (BMG  
554 Labtech GmbH, Germany) and polarization was calculated. The data were analysed using  
555 a four-parameter fit calculated with MARS Data Analysis Software (BMG Labtech GmbH,  
556 Germany). Three independent measurements on three plates was performed.

557

### 558 **Reporter ligand displacement assay**

559 The assay was performed in analogy to the protocol from Joachim *et al.* (21): A serial  
560 dilution of the test compounds was prepared in TBS (150 mM NaCl, 50 mM Tris pH 7.4).

561 For single point inhibition measurements, carbohydrates were dissolved in TBS at 20 mM.  
562 A concentrated solution of AcMJRL was diluted in TBS together with the fluorescent  
563 reporter ligand **1** to yield concentrations of 40  $\mu$ M protein and 20 or 200 nM ligand,  
564 respectively. 10  $\mu$ L of this mix was added to 10  $\mu$ L previously prepared dilutions of the test  
565 compounds in black 384-well microtiter plates (Greiner Bio-One, Germany, cat. no. 781900)  
566 in triplicate. After centrifugation (2680 rcf, 1 min, r.t.), the reactions were incubated for 60  
567 min at r.t. in a humidity chamber. Fluorescence (excitation 485 nm, emission 535 nm) was  
568 measured in parallel and perpendicular to the excitation plane on a PheraStar FS plate  
569 reader (BMG Labtech GmbH, Germany). The measured intensities were reduced by the  
570 values of only AcMJRL in TBS, and fluorescence polarisation was calculated. The data  
571 were analysed with the MARS Data Analysis Software and fitted according to the four-  
572 parameter variable slope model. Bottom and top plateaus were fixed according to the value  
573 in absence of inhibitor and to the highest concentration of mannoside, respectively, and  
574 the data was reanalysed with these values fixed.

575

### 576 **Fluorescence labelling of AcMJRL**

577 *FITC*: AcMJRL was diluted in  $\text{Na}_2\text{CO}_3$ -buffer (100 mM, pH 9.3) and concentrated (Vivaspin,  
578 Sartorius Stedim Biotech GmbH, 10,000 MWCO) to yield a final protein concentration of 78  
579  $\mu$ M (1.8 mg in 1.5 mL). FITC (Merck, Germany, 95  $\mu$ L of a freshly prepared 7.7 mM solution  
580 in carbonate buffer pH 9.3, 0.73  $\mu$ mol, 6.2 eq.) was added and incubated for 1 h at r.t.. The  
581 reaction was quenched with ethanolamine (1  $\mu$ mol, 8.3 eq.) for 1 h at r.t.. Excess reagents  
582 were removed by filtration (Vivaspin, 10000 MWCO), then the protein was affinity-purified  
583 as described above for unlabelled AcMJRL. The protein concentration and degree of  
584 labelling (DOL) was calculated according to the manufacturers protocol (Thermo Scientific,  
585 Rockford, USA):

586

$$C = \frac{A_{280nm} - A_{495nm} * k}{\epsilon_{280nm}}$$

587

$$DOL = \frac{A_{495nm}}{\epsilon_{FITC}^{495nm} * C}$$

588

589  $A_{280nm}$

Absorption of labeled protein at 280 nm

590  $A_{495nm}$

Absorption of labeled protein at 495 nm

591  $\epsilon_{280nm}$

extinction coefficient of unlabeled protein at 280 nm

592  $k = 0.3$

correction factor for FITC

593  $\epsilon_{FITC}^{495nm} = 68000 \frac{l}{mol * cm}$

extinction coefficient of FITC at 495 nm

594

595 *NHS-activated Cy3*: AcMJRL was diluted in PBS pH 8.4 and concentrated (Vivaspin,  
596 Sartorius Stedim Biotech GmbH, 10,000 MWCO) to yield a final protein concentration of  
597 293  $\mu$ M (4.5 mg in 1.5 mL). NHS-activated Cy3 (Lumiprobe, Germany, 75  $\mu$ L of a freshly  
598 prepared 29 mM solution in DMSO, 2.2  $\mu$ mol, 9 eq.) was added and incubated for 5 h at  
599 r.t.. Excess reagents were removed by filtration (Vivaspin, Sartorius Stedim Biotech GmbH,  
600 10000 MWCO), then the protein was affinity-purified as described above for unlabelled  
601 AcMJRL. The protein concentration and degree of labelling (DOL) was calculated as  
602 described above.



603

604  $k = 0.08$  correction factor for Cy3

605  $\epsilon_{Cy3}^{550nm} = 150000 \frac{l}{mol \cdot cm}$  extinction coefficient of Cy3 at 550 nm

606

### 607 **Glycan array analysis**

608 FITC-labeled AcmJRL was tested by the National Center for Functional Glycomics (NCFG,  
609 Boston, MA, USA) on the CFG glycan microarray version 5.5 containing 585 printed glycans  
610 in replicates of 6. Standard procedures of NCFG (details see  
611 [https://ncfg.hms.harvard.edu/files/ncfg/files/protocol-direct\\_glycan\\_binding\\_assay-](https://ncfg.hms.harvard.edu/files/ncfg/files/protocol-direct_glycan_binding_assay-cfg_slides.docx)  
612 [cfg\\_slides.docx](https://ncfg.hms.harvard.edu/files/ncfg/files/protocol-direct_glycan_binding_assay-cfg_slides.docx)) were run with 5 and 50  $\mu\text{g}/\text{mL}$  protein based on the protocol by Blixt et al.  
613 (19). Raw-data (Tables S5 and S6) will be shared online on the CFG website.

614 Cy3-labelled AcmJRL was tested in-house on a glycan microarray slide from Semiotik LLC  
615 (Moscow, Russia) containing 610 printed glycans in replicates of 6. Standard procedures  
616 were run at 20, 200 and 400  $\mu\text{g}/\text{mL}$  based on the protocol by Olivera-Ardid *et al.*(20).  
617 Fluorescence intensity was measured at 565 nm upon excitation at 520 nm on a Sapphire  
618 Biomolecular imager (Azure Biosystems, Dublin, CA, USA) at 10  $\mu\text{m}$  resolution. Scan data  
619 was processed with ScanArray software (Perkin Elmer, Waltham, MA, USA), using  
620 OSPS090418\_full.360.80.um.gal (kindly provided by Semiotik) for dot-glycan assignment.  
621 Raw data (dot mean fluorescence intensity) was processed by GraphPad Prism 9  
622 (GraphPad Software, USA). Processed data in table format is provided in the appendix.

623

### 624 **Protease activity assay**

625 Purified AcmJRL was used and adjusted to  $A_{280nm} = 1$ . For the positive control, 2 mg  
626 bromelain powder were suspended in 2 mL buffer (100 mM KCl, 5 mM KOAc, 5 mM HOAc,  
627 pH 4.6) and incubated at 37 °C, 500 rpm on a Thermomixer (Eppendorf, Germany) for 10  
628 min. After centrifugation (17600 rcf, 10 min, r.t.) the supernatant adjusted to  $A_{280nm} = 1$ .  
629 Then, 4  $\mu\text{L}$  protein or bromelain extract was diluted in 200  $\mu\text{L}$  buffer. Z-Lys-ONP (Merck,  
630 Germany, 4  $\mu\text{L}$  from a 25 mM solution in  $\text{H}_2\text{O}/\text{MeCN}$  1:1) was added and absorption at 340  
631 nm was measured on a CLARIOstar microplate reader (BMG Labtech, Germany) for 300 s  
632 (5 s interval). Blank controls without added protein/bromelain and substrate were  
633 performed for background subtraction. Data was analysed by using GraphPad Prism 9  
634 (GraphPad Software, USA).

635

### 636 **Cloning and Recombinant Expression of SARS-CoV-2 spike protein**

637 A synthetic DNA fragment was purchased from Eurofins MWG. The nucleotide sequence  
638 was codon optimised for mammalian cell expression (translational amino acid sequence  
639 based on PDB code: 6VXX (29)). The nucleotide sequence coding for the extraviral domain  
640 of SARS-CoV-2 spike (coding for aa 1-1213) was amplified via PCR with the restriction  
641 sites 5`-BamHI/XhoI-3` (Fw Primer: ATATGGATCCATGTTTCGTGTTCCCTGGTTCTT; Rv  
642 Primer: AATATGAGCAGTACATAAAATGGCCCCTCGAGATAT; purchased from Merck). As  
643 vector system, the in house vector  $\pi\alpha$ -SHP-H (provided by Dr. Jesko Köhnke, pCAGGS  
644 based, NCBI accession number: LT727518) was chosen for the mammalian expression  
645 system. The amplicon was digested with the respective restriction enzymes (ThermoFisher)

646 and ligated with T4 Ligase (ThermoFisher) into the linearised  $\pi\alpha$ -SHP-H vector to clone  $\pi\alpha$ -  
647 SHP-H-Sgene with an N-terminal octahistidin tag.

648 The mammalian cell line HEK 293/T served as host for recombinant production of the  
649 glycoprotein. The cells were cultured with Dulbecco's Modified Eagle Medium (DMEM,  
650 Sigma Aldrich) in a Hyperflask M (A= 1720 cm<sup>2</sup>, Corning) and incubated at 37 °C under 5%  
651 CO<sub>2</sub> atmosphere until a confluence of 80-90% was reached. The transient mammalian  
652 transfection was applied in a mass ratio of 1:2  $\pi\alpha$ -SHP-H-Sgene : PEI (linear, MW > 25000,  
653 Alfa Aesar) (30). After 5 h incubation, the medium was exchanged and the transfected cell  
654 line was incubated for 48 h at 37 °C under 5% CO<sub>2</sub> atmosphere before the supernatant  
655 was filtered (0.22  $\mu$ m pore size) and stored on ice. The supernatant was loaded onto a 5  
656 mL HisTrap HP column and washed with 20 column volumes lysis buffer (200 mM NaCl,  
657 20 mM Tris, 20 mM imidazol pH 8) and the protein was obtained with elution buffer (200  
658 mM NaCl, 20 mM Tris, 500 mM imidazole pH 8). Size exclusion chromatography was  
659 performed on a HiLoad 16/600 Superdex 200 PG. The elution volume of 60-70 mL was  
660 collected and the solution was concentrated to a volume of 200  $\mu$ L with an Amicon Ultra-  
661 15 PLHK Ultracel-PL Membrane 100 kDa (Merck) spin column. The amount of SARS-CoV-  
662 2 spike protein was determined via UV absorbance measurement on a Nanodrop 2000c to  
663 a mass concentration of 7.1 mg/mL ( $\epsilon = 141,35 \cdot 10^3 \text{ L} \cdot \text{mol}^{-1} \cdot \text{cm}^{-1}$ ; MW = 142.13 kDa). For  
664 SDS-PAGE, 20  $\mu$ L (6  $\mu$ g) of SARS-CoV-2 spike protein (in 150 mM NaCl, 20mM HEPES pH  
665 8) was mixed with 4  $\mu$ L 6x SDS-loading buffer (1.2 g SDS, 6 mg bromophenolblue, 4 mL  
666 glycerol, 0.6 mL 1 M Tris pH 8.0, 5.4 mL H<sub>2</sub>O, 930 mg dithiothreitol) and heated for 2 min  
667 at 100 °C, afterwards cooled to r.t.. A SDS-PAGE gel (10% v/v polyacrylamide) was loaded  
668 with 20  $\mu$ L of the prepared sample. 6  $\mu$ L PageRulerPlus Prestained Protein Ladder  
669 (ThermoFisher Scientific) was loaded to monitor the progress of the SDS-PAGE and to  
670 estimate the approximate size of the protein after staining the gel. The SDS-PAGE was run  
671 in a Mini-PROTEAN Tetra System (BIO RAD) with SDS Laemmli buffer at 150 V for 100 min.  
672 The gel was stained with Coomassie Brilliant Blue.

673

#### 674 **Deglycosylation with PNGase F**

675 To 5  $\mu$ g of spike-protein in 20  $\mu$ L of 50 mM sodium phosphate buffer (pH 7.5), 2  $\mu$ L (1000  
676 U) PNGase F (New England Biolabs Inc) were added and the reaction was incubated for 6  
677 h at 37 °C. As a negative control, the same amount of spike-protein was incubated in  
678 absence of enzyme in otherwise identical conditions.

679

#### 680 **Surface Plasmon Resonance (SPR)**

681 SPR experiments were conducted on a Biacore X100-system (GE Healthcare). SARS-CoV-  
682 2 spike-protein was immobilised on a CM5 sensorchip after EDC/NHS activation via amine  
683 coupling (0.5 M 1-ethyl-3-(3-dimethylamino-propyl) carbodiimide hydrochloride and 0.1 M  
684 N-hydroxysuccinimide in water for activation). The glycoprotein was dissolved in 10 mM  
685 sodium acetate pH 4.5 (50  $\mu$ g/mL) and injected over the activated chip surface (contact  
686 time of 200 s, flow rate of 30  $\mu$ L/min), followed by ethanolamine for deactivation of excess  
687 reactive NHS ester groups in to obtain a final response of ~6700 RU. The ACE2 receptor  
688 (Sigma Aldrich, SAE0064) was immobilised on a CM5 sensorchip using the same

689 conditions and a final response of ~990 RU was obtained. The SARS-CoV-2 spike RBD  
690 (ThermoFisher) was immobilised on a CM5 sensorchip under the same conditions and a  
691 final response of ~1970 RU was obtained. SPR assays were performed with a flow rate of  
692 30  $\mu$ L min in HBS-EP (150 mM NaCl, 10 mM HEPES pH 7.4, 3 mM EDTA, 0.005%  
693 Polysorbate-20). Increasing concentrations of AcMJRL (1.25, 2.5, 5.0, 10.0, 20  $\mu$ M) with or  
694 without 10 mM mannitriose in the sample buffer were injected for single cycle  
695 measurements (120 s contact time, 180 s dissociation time). Respectively, increasing  
696 concentrations of RBD (6.75 – 100 nM) with or without AcMJRL in a molar ratio of  
697 RBD:AcMJRL of 1:10 and 1:100 were injected for single cycle measurements (120 s contact  
698 time, 180 s dissociation time). The CM5 chip surface was regenerated by one injection of  
699 ethylene glycol 80% v/v (contact time 30 sec, flow rate 30  $\mu$ L/ min, followed by 2 x injections  
700 of HBS-EP (60 sec, flow rate 30 $\mu$ L/min). Binding analysis results were evaluated using the  
701 Biacore X100 evaluation software to plot the sensorgrams and the Langmuir graphs, and  
702 to determine dissociation constants. Graphs were visualised with Graphpad Prism 9  
703 software (Graph Pad Software, San Diego, CA, USA). Spikes caused by instrumental  
704 effects were removed by omitting 3-5 seconds around each injection.

705

## 706 **Supporting Information**

707

708 Additional data can be found in the supporting information pdf file.

709 Raw data for the CFG Glycan Array for AcMJRL can be found in the attached xls file.

## 710 References

- 711 1. Kim, M. A., Lee, Y. W., Kim, S. R., Kim, J. H., Min, T. K., Park, H. S., Shin, M., Ye, Y. M.,  
712 Lee, S., Lee, J., Choi, J. H., Jang, G. C., and Chang, Y. S. (2021) COVID-19 Vaccine-  
713 associated Anaphylaxis and Allergic Reactions: Consensus Statements of the KAAACI  
714 Urticaria/Angioedema/Anaphylaxis Working Group. *Allergy Asthma Immunol. Res.* **13**, 526-  
715 544
- 716 2. Ritchie, G., Harvey, D. J., Feldmann, F., Stroehrer, U., Feldmann, H., Royle, L., Dwek, R. A.,  
717 and Rudd, P. M. (2010) Identification of N-linked carbohydrates from severe acute  
718 respiratory syndrome (SARS) spike glycoprotein. *Virology* **399**, 257-269
- 719 3. Watanabe, Y., Allen, J. D., Wrapp, D., McLellan, J. S., and Crispin, M. (2020) Site-specific  
720 glycan analysis of the SARS-CoV-2 spike. *Science* **369**, 330-333
- 721 4. Zhao, X., Chen, H., and Wang, H. (2021) Glycans of SARS-CoV-2 Spike Protein in Virus  
722 Infection and Antibody Production. *Front. Mol. Biosci.* **8**, 629873
- 723 5. Shajahan, A., Supekar, N. T., Gleinich, A. S., and Azadi, P. (2020) Deducing the N- and O-  
724 glycosylation profile of the spike protein of novel coronavirus SARS-CoV-2. *Glycobiology*  
725 **30**, 981-988
- 726 6. Hoffmann, M., Kleine-Weber, H., Schroeder, S., Kruger, N., Herrler, T., Erichsen, S.,  
727 Schiergens, T. S., Herrler, G., Wu, N. H., Nitsche, A., Muller, M. A., Drosten, C., and  
728 Pohlmann, S. (2020) SARS-CoV-2 Cell Entry Depends on ACE2 and TMPRSS2 and Is  
729 Blocked by a Clinically Proven Protease Inhibitor. *Cell* **181**, 271-280 e278
- 730 7. Keyaerts, E., Vijgen, L., Pannecouque, C., Van Damme, E., Peumans, W., Egberink, H.,  
731 Balzarini, J., and Van Ranst, M. (2007) Plant lectins are potent inhibitors of coronaviruses  
732 by interfering with two targets in the viral replication cycle. *Antiviral Res.* **75**, 179-187
- 733 8. Hoffmann, D., Mereiter, S., Jin Oh, Y., Monteil, V., Elder, E., Zhu, R., Canena, D., Hain, L.,  
734 Laurent, E., Grunwald-Gruber, C., Klausberger, M., Jonsson, G., Kellner, M. J.,  
735 Novatchkova, M., Ticevic, M., Chabloz, A., Wirnsberger, G., Hagelkruys, A., Altmann, F.,  
736 Mach, L., Stadlmann, J., Oostenbrink, C., Mirazimi, A., Hinterdorfer, P., and Penninger, J.  
737 M. (2021) Identification of lectin receptors for conserved SARS-CoV-2 glycosylation sites.  
738 *EMBO J.* **40**, e108375
- 739 9. Rathnavelu, V., Alitheen, N. B., Sohila, S., Kanagesan, S., and Ramesh, R. (2016) Potential  
740 role of bromelain in clinical and therapeutic applications. *Biomed. Rep.* **5**, 283-288
- 741 10. de Lencastre Novaes, L. C., Jozala, A. F., Lopes, A. M., de Carvalho Santos-Ebinuma, V.,  
742 Mazzola, P. G., and Pessoa Junior, A. (2016) Stability, purification, and applications of  
743 bromelain: A review. *Biotechnol. Prog.* **32**, 5-13
- 744 11. Gross, P., Seelert, H., Meiser, P., and Müller, R. (2020) Characterization of bromelain  
745 indicates a molar excess of inhibitor vs. enzyme molecules, a Jacalin-like lectin and  
746 Maillard reaction products. *J. Pharm. Biomed. Anal.* **181**, 113075
- 747 12. Azarkan, M., Feller, G., Vandenameele, J., Herman, R., El Mahyaoui, R., Sauvage, E.,  
748 Vanden Broeck, A., Matagne, A., Charlier, P., and Kerff, F. (2018) Biochemical and  
749 structural characterization of a mannose binding jacalin-related lectin with two-sugar  
750 binding sites from pineapple (*Ananas comosus*) stem. *Sci. Rep.* **8**, 11508
- 751 13. Damme, E. J. M. V., Peumans, W. J., Barre, A., and Rougé, P. (1998) Plant Lectins: A  
752 Composite of Several Distinct Families of Structurally and Evolutionary Related Proteins  
753 with Diverse Biological Roles. *Crit. Rev. Plant Sci.* **17**, 575-692

- 754 14. Swanson, M. D., Winter, H. C., Goldstein, I. J., and Markovitz, D. M. (2010) A lectin  
755 isolated from bananas is a potent inhibitor of HIV replication. *J. Biol. Chem.* **285**, 8646-  
756 8655
- 757 15. Swanson, M. D., Boudreaux, D. M., Salmon, L., Chugh, J., Winter, H. C., Meagher, J. L.,  
758 Andre, S., Murphy, P. V., Oscarson, S., Roy, R., King, S., Kaplan, M. H., Goldstein, I. J.,  
759 Tarbet, E. B., Hurst, B. L., Smee, D. F., de la Fuente, C., Hoffmann, H. H., Xue, Y., Rice, C.  
760 M., Schols, D., Garcia, J. V., Stuckey, J. A., Gabius, H. J., Al-Hashimi, H. M., and  
761 Markovitz, D. M. (2015) Engineering a therapeutic lectin by uncoupling mitogenicity from  
762 antiviral activity. *Cell* **163**, 746-758
- 763 16. Fornstedt, N., and Porath, J. (1975) CHARACTERIZATION STUDIES ON A NEW LECTIN  
764 FOUND IN SEEDS OF *VICIA ERVILLA*. *FEBS LETTERS* **57**, 187-191
- 765 17. Lund, M. N., and Ray, C. A. (2017) Control of Maillard Reactions in Foods: Strategies and  
766 Chemical Mechanisms. *J. Agric. Food Chem.* **65**, 4537-4552
- 767 18. Oyelaran, O., and Gildersleeve, J. C. (2009) Glycan arrays: recent advances and future  
768 challenges. *Curr. Opin. Chem. Biol.* **13**, 406-413
- 769 19. Blixt, O., Head, S., Mondala, T., Scanlan, C., Huflejt, M. E., Alvarez, R., Bryan, M. C.,  
770 Fazio, F., Calarese, D., Stevens, J., Razi, N., Stevens, D. J., Skehel, J. J., van Die, I.,  
771 Burton, D. R., Wilson, I. A., Cummings, R., Bovin, N., Wong, C. H., and Paulson, J. C.  
772 (2004) Printed covalent glycan array for ligand profiling of diverse glycan binding proteins.  
773 *Proc. Natl. Acad. Sci. U.S.A* **101**, 17033-17038
- 774 20. Olivera-Ardid, S., Khasbiullina, N., Nokel, A., Formanovsky, A., Popova, I., Tyrtys, T.,  
775 Kunetskiy, R., Shilova, N., Bovin, N., Bello-Gil, D., and Mañez, R. (2019) Printed Glycan  
776 Array: A Sensitive Technique for the Analysis of the Repertoire of Circulating Anti-  
777 carbohydrate Antibodies in Small Animals. *J. Vis. Exp.*, 57662
- 778 21. Joachim, I., Rikker, S., Hauck, D., Ponader, D., Boden, S., Sommer, R., Hartmann, L., and  
779 Titz, A. (2016) Development and optimization of a competitive binding assay for the  
780 galactophilic low affinity lectin LecA from *Pseudomonas aeruginosa*. *Org. Biomol. Chem.*  
781 **14**, 7933-7948
- 782 22. Sommer, R., Wagner, S., Varrot, A., Nycholat, C. M., Khaledi, A., Häussler, S., Paulson, J.  
783 C., Imberty, A., and Titz, A. (2016) The virulence factor LecB varies in clinical isolates:  
784 consequences for ligand binding and drug discovery. *Chem. Sci.* **7**, 4990-5001
- 785 23. Hauck, D., Joachim, I., Frommeyer, B., Varrot, A., Philipp, B., Möller, H. M., Imberty, A.,  
786 Exner, T. E., and Titz, A. (2013) Discovery of Two Classes of Potent Glycomimetic  
787 Inhibitors of *Pseudomonas aeruginosa* LecB with Distinct Binding Modes. *ACS Chem.*  
788 *Biol.* **8**, 1775-1784
- 789 24. Beshr, G., Sikandar, A., Jemiller, E.-M., Klymiuk, N., Hauck, D., Wagner, S., Wolf, E.,  
790 Koehnke, J., and Titz, A. (2017) *Photobacterium luminescens* lectin A (PILIA): A new probe for  
791 detecting  $\alpha$ -galactoside-terminating glycoconjugates. *J. Biol. Chem.* **292**, 19935-19951
- 792 25. Casalino, L., Gaieb, Z., Goldsmith, J. A., Hjorth, C. K., Dommer, A. C., Harbison, A. M.,  
793 Fogarty, C. A., Barros, E. P., Taylor, B. C., McLellan, J. S., Fadda, E., and Amaro, R. E.  
794 (2020) Beyond Shielding: The Roles of Glycans in the SARS-CoV-2 Spike Protein. *ACS*  
795 *Cent. Sci.* **6**, 1722-1734
- 796 26. Harbison, A. M., Fogarty, C. A., Phung, T. K., Satheesan, A., Schulz, B. L., and Fadda, E.  
797 (2022) Fine-tuning the spike: role of the nature and topology of the glycan shield in the  
798 structure and dynamics of the SARS-CoV-2 S. *Chem. Sci.* **13**, 386-395



- 799 27. Shajahan, A., Archer-Hartmann, S., Supekar, N. T., Gleinich, A. S., Heiss, C., and Azadi, P.  
800 (2021) Comprehensive characterization of N- and O- glycosylation of SARS-CoV-2 human  
801 receptor angiotensin converting enzyme 2. *Glycobiology* **31**, 410-424
- 802 28. Wrapp, D., Wang, N., Corbett, K. S., Goldsmith, J. A., Hsieh, C.-L., Abiona, O., Graham, B.  
803 S., and McLellan, J. S. (2020) Cryo-EM structure of the 2019-nCoV spike in the prefusion  
804 conformation. *Science* **367**, 1260-1263
- 805 29. Walls, A. C., Park, Y. J., Tortorici, M. A., Wall, A., McGuire, A. T., and Veessler, D. (2020)  
806 Structure, Function, and Antigenicity of the SARS-CoV-2 Spike Glycoprotein. *Cell* **181**,  
807 281-292 e286
- 808 30. Longo, P. A., Kavran, J. M., Kim, M. S., and Leahy, D. J. (2013) Transient mammalian cell  
809 transfection with polyethylenimine (PEI). *Meth. Enzymol.* **529**, 227-240  
810
